# Supplementary material for: Mechanisms of photoexcitation and photoionization in small water clusters
Source: Royal Society of Chemistry journal article supplement (doi:10.1039/c8ra06095a), 2018-01-01
Supplement: c8ra06095a1.pdf [file c8ra06095a1.pdf]

**Table S1** Structure parameters and energies of the water monomer, dimer and trimer obtained from CASPT2(4,4), (4,6) and (4,8) calculations, respectively. Distances and angles are in Å and degree, respectively.

|                                                                                                     | $E^{\text{Tot}}$                                         | $E^{\text{Ex}}$ |                                                                | Distance                         |      | Angle            |
|-----------------------------------------------------------------------------------------------------|----------------------------------------------------------|-----------------|----------------------------------------------------------------|----------------------------------|------|------------------|
| <b>G1-[1]</b><br>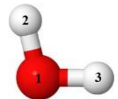  | -76.255865<br>(-75.991115)<br>-76.255059<br>(-75.992457) | 7.20<br>[7.15]  | OH                                                             | 0.97<br>[0.97]                   | ∠HOH | 104.0<br>[103.2] |
| <b>E1-[1]</b><br>  | -76.234152<br>(-76.003777)<br>-76.234555<br>(-76.003505) | 6.27<br>[6.28]  | OH                                                             | 1.09<br>[1.08]                   | ∠HOH | 104.9<br>[106.5] |
| <b>E1-[2]</b><br> | -76.050102<br>(-76.031022)<br>-76.045284<br>(-76.034444) | 0.51<br>[0.29]  | O <sub>1</sub> H <sub>2</sub><br>O <sub>1</sub> H <sub>3</sub> | 1.09<br>[1.09]<br>1.55<br>[1.55] | ∠HOH | 174.5<br>[174.5] |

$E^{\text{Tot}}$  = Total energy in au;  $E^{\text{Ex}}$  =  $S_0 \rightarrow S_1$  excitation energy in eV; [..] = Values obtained from the CASPT2(6,5) method; ‡ = Transition state complex; (..) = Total energies in the  $S_1$  state.

Table S1 (cont.)

|                                                                                     | $E^{\text{Tot}}$              | $E^{\text{Ex}}$ | Distance                      |                                        | Angle                                  |                                                  | Dihedral                                         |       |
|-------------------------------------------------------------------------------------|-------------------------------|-----------------|-------------------------------|----------------------------------------|----------------------------------------|--------------------------------------------------|--------------------------------------------------|-------|
| <b>G2-[1]</b>                                                                       |                               |                 |                               |                                        |                                        |                                                  |                                                  |       |
| 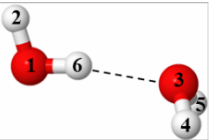   | -152.527356                   | 7.29            | O <sub>1</sub> H <sub>2</sub> | 0.97                                   | $\angle\text{O}_3\text{O}_1\text{H}_2$ | 109.9                                            | $\angle\text{H}_4\text{O}_3\text{O}_1\text{H}_2$ | 237.2 |
|                                                                                     | (-152.259461)                 |                 | O <sub>1</sub> H <sub>6</sub> | 0.97                                   | $\angle\text{H}_4\text{O}_3\text{O}_1$ | 109.1                                            | $\angle\text{H}_5\text{O}_3\text{H}_4\text{O}_1$ | 115.5 |
|                                                                                     | O <sub>3</sub> H <sub>4</sub> |                 | 0.97                          | $\angle\text{H}_5\text{O}_3\text{H}_4$ | 104.0                                  | $\angle\text{H}_6\text{O}_1\text{H}_2\text{O}_3$ | 0.0                                              |       |
|                                                                                     | O <sub>3</sub> H <sub>5</sub> |                 | 0.97                          | $\angle\text{H}_6\text{O}_1\text{H}_2$ | 104.4                                  |                                                  |                                                  |       |
|                                                                                     | O <sub>1</sub> O <sub>3</sub> |                 | 2.94                          |                                        |                                        |                                                  |                                                  |       |
|                                                                                     |                               |                 |                               |                                        |                                        |                                                  |                                                  |       |
| <b>E2-[1]</b>                                                                       |                               |                 |                               |                                        |                                        |                                                  |                                                  |       |
|    | -152.485007                   | 5.49            | O <sub>1</sub> H <sub>2</sub> | 1.14                                   | $\angle\text{O}_3\text{O}_1\text{H}_2$ | 87.9                                             | $\angle\text{H}_4\text{O}_3\text{O}_1\text{H}_2$ | 105.4 |
|                                                                                     | (-152.283192)                 |                 | O <sub>1</sub> H <sub>6</sub> | 1.08                                   | $\angle\text{H}_4\text{O}_3\text{O}_1$ | 117.4                                            | $\angle\text{H}_5\text{O}_3\text{H}_4\text{O}_1$ | 100.5 |
|                                                                                     | O <sub>3</sub> H <sub>4</sub> |                 | 0.97                          | $\angle\text{H}_5\text{O}_3\text{H}_4$ | 104.7                                  | $\angle\text{H}_6\text{O}_1\text{H}_2\text{O}_3$ | 1.1                                              |       |
|                                                                                     | O <sub>3</sub> H <sub>5</sub> |                 | 0.99                          | $\angle\text{H}_6\text{O}_1\text{H}_2$ | 96.4                                   |                                                  |                                                  |       |
|                                                                                     | O <sub>1</sub> O <sub>3</sub> |                 | 2.47                          |                                        |                                        |                                                  |                                                  |       |
| <b>E2-[2]</b>                                                                       |                               |                 |                               |                                        |                                        |                                                  |                                                  |       |
|  | -152.400416                   | 2.61            | O <sub>1</sub> H <sub>2</sub> | 0.98                                   | $\angle\text{O}_3\text{O}_1\text{H}_2$ | 104.3                                            | $\angle\text{H}_4\text{O}_3\text{O}_1\text{H}_2$ | 87.0  |
|                                                                                     | (-152.304451)                 |                 | O <sub>3</sub> H <sub>6</sub> | 1.01                                   | $\angle\text{H}_4\text{O}_3\text{O}_1$ | 109.5                                            | $\angle\text{H}_5\text{O}_3\text{H}_4\text{O}_1$ | 109.9 |
|                                                                                     | O <sub>3</sub> H <sub>4</sub> |                 | 1.02                          | $\angle\text{H}_5\text{O}_3\text{H}_4$ | 104.1                                  | $\angle\text{H}_6\text{O}_1\text{H}_2\text{O}_3$ | 2.0                                              |       |
|                                                                                     | O <sub>3</sub> H <sub>5</sub> |                 | 1.04                          | $\angle\text{H}_6\text{O}_1\text{H}_2$ | 104.8                                  |                                                  |                                                  |       |
|                                                                                     | O <sub>1</sub> O <sub>3</sub> |                 | 2.82                          |                                        |                                        |                                                  |                                                  |       |

Table S1 (cont.)

|                                                                                    | $E^{\text{Tot}}$ | $E^{\text{Ex}}$ | Distance                      |      | Angle                                  |       | Dihedral                                         |       |
|------------------------------------------------------------------------------------|------------------|-----------------|-------------------------------|------|----------------------------------------|-------|--------------------------------------------------|-------|
| <b>E2-[3]</b>                                                                      | -152.384207      | 1.54            | O <sub>1</sub> H <sub>2</sub> | 1.85 | $\angle\text{O}_3\text{O}_1\text{H}_2$ | 85.3  | $\angle\text{H}_4\text{O}_3\text{O}_1\text{H}_2$ | 129.4 |
| 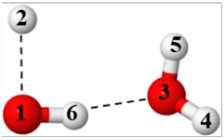  | (-152.327591)    |                 | O <sub>3</sub> H <sub>6</sub> | 1.88 | $\angle\text{H}_4\text{O}_3\text{O}_1$ | 126.2 | $\angle\text{H}_5\text{O}_3\text{H}_4\text{O}_1$ | 120.8 |
|                                                                                    |                  |                 | O <sub>3</sub> H <sub>4</sub> | 0.97 | $\angle\text{H}_5\text{O}_3\text{H}_4$ | 104.5 | $\angle\text{H}_6\text{O}_1\text{H}_2\text{O}_3$ | 0.0   |
|                                                                                    |                  |                 | O <sub>3</sub> H <sub>5</sub> | 0.97 | $\angle\text{H}_6\text{O}_1\text{H}_2$ | 92.8  |                                                  |       |
|                                                                                    |                  |                 | O <sub>1</sub> O <sub>3</sub> | 2.85 |                                        |       |                                                  |       |
| <b>E2-[4]</b>                                                                      | -152.338544      | 0.79            | O <sub>1</sub> H <sub>2</sub> | 0.98 | $\angle\text{O}_3\text{O}_1\text{H}_2$ | 81.7  | $\angle\text{H}_4\text{O}_3\text{O}_1\text{H}_2$ | 105.4 |
|  | (-152.309391)    |                 | O <sub>3</sub> H <sub>6</sub> | 0.99 | $\angle\text{H}_4\text{O}_3\text{O}_1$ | 117.0 | $\angle\text{H}_5\text{O}_3\text{H}_4\text{O}_1$ | 88.8  |
|                                                                                    |                  |                 | O <sub>3</sub> H <sub>4</sub> | 0.98 | $\angle\text{H}_5\text{O}_3\text{H}_4$ | 104.2 | $\angle\text{H}_6\text{O}_1\text{H}_2\text{O}_3$ | 3.1   |
|                                                                                    |                  |                 | O <sub>3</sub> H <sub>5</sub> | 1.30 | $\angle\text{H}_6\text{O}_1\text{H}_2$ | 91.4  |                                                  |       |
|                                                                                    |                  |                 | O <sub>1</sub> O <sub>3</sub> | 2.83 |                                        |       |                                                  |       |

Table S1 (cont.)

|               | $E^{\text{Tot}}$       | $E^{\text{Ex}}$ | Distance               |                                        | Angle                                  |                                                  | Dihedral                                         |       |
|---------------|------------------------|-----------------|------------------------|----------------------------------------|----------------------------------------|--------------------------------------------------|--------------------------------------------------|-------|
| <b>G3-[1]</b> | -228.799506            | 7.17            | $\text{O}_1\text{H}_2$ | 0.96                                   | $\angle\text{O}_3\text{O}_1\text{H}_2$ | 107.4                                            | $\angle\text{O}_4\text{O}_3\text{O}_1\text{H}_2$ | 108.0 |
|               | (-228.536069)          |                 | $\text{O}_1\text{O}_3$ | 2.92                                   | $\angle\text{O}_4\text{O}_3\text{O}_1$ | 107.8                                            | $\angle\text{H}_5\text{O}_1\text{H}_2\text{O}_3$ | 357.9 |
|               | $\text{O}_3\text{O}_4$ |                 | 2.87                   | $\angle\text{H}_5\text{O}_1\text{H}_2$ | 104.1                                  | $\angle\text{H}_6\text{O}_3\text{O}_4\text{O}_1$ | 150.0                                            |       |
|               | $\text{O}_1\text{H}_5$ |                 | 0.97                   | $\angle\text{H}_6\text{O}_3\text{O}_4$ | 174.7                                  | $\angle\text{H}_7\text{O}_4\text{H}_6\text{O}_3$ | 96.6                                             |       |
|               | $\text{O}_3\text{H}_6$ |                 | 0.97                   | $\angle\text{H}_7\text{O}_4\text{H}_6$ | 122.6                                  | $\angle\text{H}_8\text{O}_3\text{H}_6\text{O}_4$ | 168.5                                            |       |
|               | $\text{O}_4\text{H}_7$ |                 | 0.98                   | $\angle\text{H}_8\text{O}_3\text{H}_6$ | 104.5                                  | $\angle\text{H}_9\text{O}_4\text{H}_7\text{O}_3$ | 148.7                                            |       |
|               | $\text{O}_3\text{H}_8$ |                 | 0.97                   | $\angle\text{H}_9\text{O}_4\text{H}_7$ | 104.6                                  |                                                  |                                                  |       |
|               | $\text{O}_4\text{H}_9$ |                 | 0.97                   |                                        |                                        |                                                  |                                                  |       |

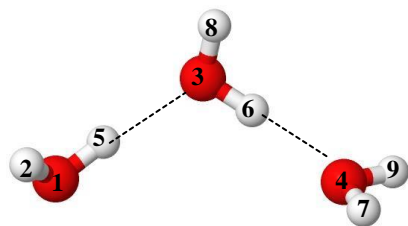

Table S1 (cont.)

|               | $E^{\text{Tot}}$ | $E^{\text{Ex}}$ | Distance                      |      | Angle                                  |       | Dihedral                                         |       |
|---------------|------------------|-----------------|-------------------------------|------|----------------------------------------|-------|--------------------------------------------------|-------|
| <b>G3-[2]</b> | -228.805785      | 7.62            | O <sub>1</sub> H <sub>2</sub> | 0.96 | $\angle\text{O}_3\text{O}_1\text{H}_2$ | 121.7 | $\angle\text{O}_4\text{O}_3\text{O}_1\text{H}_2$ | 231.3 |
|               | (-228.525698)    |                 | O <sub>1</sub> O <sub>3</sub> | 2.82 | $\angle\text{O}_4\text{O}_3\text{O}_1$ | 59.9  | $\angle\text{H}_5\text{O}_1\text{H}_2\text{O}_3$ | 13.5  |
|               |                  |                 | O <sub>3</sub> O <sub>4</sub> | 2.81 | $\angle\text{H}_5\text{O}_1\text{H}_2$ | 105.3 | $\angle\text{H}_6\text{O}_3\text{O}_4\text{O}_1$ | 191.0 |
|               |                  |                 | O <sub>1</sub> H <sub>5</sub> | 0.98 | $\angle\text{H}_6\text{O}_3\text{O}_4$ | 20.6  | $\angle\text{H}_7\text{O}_4\text{H}_6\text{O}_3$ | 14.9  |
|               |                  |                 | O <sub>3</sub> H <sub>6</sub> | 0.98 | $\angle\text{H}_7\text{O}_4\text{H}_6$ | 90.0  | $\angle\text{H}_8\text{O}_3\text{H}_6\text{O}_4$ | 215.8 |
|               |                  |                 | O <sub>4</sub> H <sub>7</sub> | 0.98 | $\angle\text{H}_8\text{O}_3\text{H}_6$ | 105.1 | $\angle\text{H}_9\text{O}_4\text{H}_7\text{O}_3$ | 223.5 |
|               |                  |                 | O <sub>3</sub> H <sub>8</sub> | 0.96 | $\angle\text{H}_9\text{O}_4\text{H}_7$ | 105.1 |                                                  |       |
|               |                  |                 | O <sub>4</sub> H <sub>9</sub> | 0.96 |                                        |       |                                                  |       |

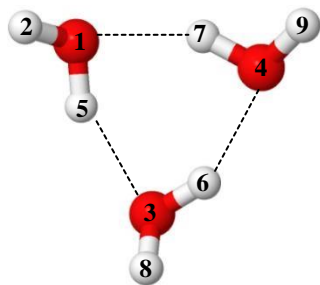

Table S1 (cont.)

|                                                                                                                    | $E^{\text{Tot}}$              | $E^{\text{Ex}}$ | Distance                      |                                        | Angle                                  |                                                  | Dihedral                                         |      |
|--------------------------------------------------------------------------------------------------------------------|-------------------------------|-----------------|-------------------------------|----------------------------------------|----------------------------------------|--------------------------------------------------|--------------------------------------------------|------|
| <b>E3-[1]<sup>†</sup></b><br><br>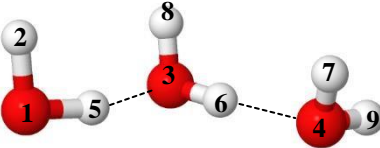 | -228.7564730                  | 5.39            | O <sub>1</sub> H <sub>2</sub> | 1.13                                   | $\angle\text{O}_3\text{O}_1\text{H}_2$ | 90.8                                             | $\angle\text{O}_4\text{O}_3\text{O}_1\text{H}_2$ | 96.4 |
|                                                                                                                    | (-228.5585441)                |                 | O <sub>1</sub> O <sub>3</sub> | 2.47                                   | $\angle\text{O}_4\text{O}_3\text{O}_1$ | 116.2                                            | $\angle\text{H}_5\text{O}_1\text{H}_2\text{O}_3$ | 0.7  |
|                                                                                                                    | O <sub>3</sub> O <sub>4</sub> |                 | 2.79                          | $\angle\text{H}_5\text{O}_1\text{H}_2$ | 98.3                                   | $\angle\text{H}_6\text{O}_3\text{O}_4\text{O}_1$ | 28.8                                             |      |
|                                                                                                                    | O <sub>1</sub> H <sub>5</sub> |                 | 1.10                          | $\angle\text{H}_6\text{O}_3\text{O}_4$ | 0.0                                    | $\angle\text{H}_7\text{O}_4\text{H}_6\text{O}_3$ | 17.9                                             |      |
|                                                                                                                    | O <sub>3</sub> H <sub>6</sub> |                 | 0.99                          | $\angle\text{H}_7\text{O}_4\text{H}_6$ | 106.5                                  | $\angle\text{H}_8\text{O}_3\text{H}_6\text{O}_4$ | 326.7                                            |      |
|                                                                                                                    | O <sub>4</sub> H <sub>7</sub> |                 | 0.96                          | $\angle\text{H}_8\text{O}_3\text{H}_6$ | 103.0                                  | $\angle\text{H}_9\text{O}_4\text{H}_7\text{O}_3$ | 114.2                                            |      |
|                                                                                                                    | O <sub>3</sub> H <sub>8</sub> |                 | 0.98                          | $\angle\text{H}_9\text{O}_4\text{H}_7$ | 107.2                                  |                                                  |                                                  |      |
|                                                                                                                    | O <sub>4</sub> H <sub>9</sub> |                 | 0.95                          |                                        |                                        |                                                  |                                                  |      |

Table S1 (cont.)

|               | $E^{\text{Tot}}$              | $E^{\text{Ex}}$ | Distance                      |                                        | Angle                                  |                                                  | Dihedral                                         |      |
|---------------|-------------------------------|-----------------|-------------------------------|----------------------------------------|----------------------------------------|--------------------------------------------------|--------------------------------------------------|------|
| <b>E3-[2]</b> | -228.682179                   | 2.75            | O <sub>1</sub> H <sub>2</sub> | 0.98                                   | $\angle\text{O}_3\text{O}_1\text{H}_2$ | 97.4                                             | $\angle\text{O}_4\text{O}_3\text{O}_1\text{H}_2$ | 91.0 |
|               | (-228.581076)                 |                 | O <sub>1</sub> O <sub>3</sub> | 2.78                                   | $\angle\text{O}_4\text{O}_3\text{O}_1$ | 113.1                                            | $\angle\text{H}_5\text{O}_1\text{H}_2\text{O}_3$ | 1.9  |
|               | O <sub>3</sub> O <sub>4</sub> |                 | 2.59                          | $\angle\text{H}_5\text{O}_1\text{H}_2$ | 100.2                                  | $\angle\text{H}_6\text{O}_3\text{O}_4\text{O}_1$ | 277.2                                            |      |
|               | O <sub>1</sub> H <sub>5</sub> |                 | 1.79                          | $\angle\text{H}_6\text{O}_3\text{O}_4$ | 5.8                                    | $\angle\text{H}_7\text{O}_4\text{H}_6\text{O}_3$ | 358.6                                            |      |
|               | O <sub>3</sub> H <sub>6</sub> |                 | 1.03                          | $\angle\text{H}_7\text{O}_4\text{H}_6$ | 100.8                                  | $\angle\text{H}_8\text{O}_3\text{H}_6\text{O}_4$ | 5.8                                              |      |
|               | O <sub>4</sub> H <sub>7</sub> |                 | 0.98                          | $\angle\text{H}_8\text{O}_3\text{H}_6$ | 102.6                                  | $\angle\text{H}_9\text{O}_4\text{H}_7\text{O}_3$ | 118.5                                            |      |
|               | O <sub>3</sub> H <sub>8</sub> |                 | 1.05                          | $\angle\text{H}_9\text{O}_4\text{H}_7$ | 104.5                                  |                                                  |                                                  |      |
|               | O <sub>4</sub> H <sub>9</sub> |                 | 0.97                          |                                        |                                        |                                                  |                                                  |      |

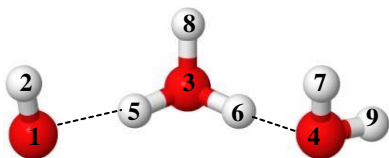

Table S1 (cont.)

|                                                                                                        | $E^{\text{Tot}}$              | $E^{\text{Ex}}$ | Distance                      |                                        | Angle                                  |                                                  | Dihedral                                         |       |
|--------------------------------------------------------------------------------------------------------|-------------------------------|-----------------|-------------------------------|----------------------------------------|----------------------------------------|--------------------------------------------------|--------------------------------------------------|-------|
| <p><b>LS-[5]</b></p> 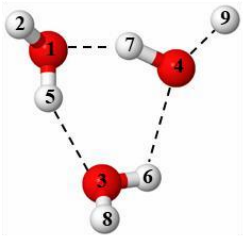 | -228.676045                   | 2.49            | O <sub>1</sub> H <sub>2</sub> | 0.97                                   | $\angle\text{O}_3\text{O}_1\text{H}_2$ | 121.4                                            | $\angle\text{O}_4\text{O}_3\text{O}_1\text{H}_2$ | 236.3 |
|                                                                                                        | (-228.584499)                 |                 | O <sub>1</sub> O <sub>4</sub> | 2.52                                   | $\angle\text{O}_4\text{O}_3\text{O}_1$ | 54.1                                             | $\angle\text{H}_5\text{O}_1\text{H}_2\text{O}_3$ | 16.8  |
|                                                                                                        | O <sub>1</sub> O <sub>3</sub> |                 | 2.80                          | $\angle\text{H}_5\text{O}_1\text{H}_2$ | 105.9                                  | $\angle\text{H}_6\text{O}_3\text{O}_4\text{O}_1$ | 163.9                                            |       |
|                                                                                                        | O <sub>1</sub> H <sub>5</sub> |                 | 0.97                          | $\angle\text{H}_6\text{O}_3\text{O}_4$ | 48.5                                   | $\angle\text{H}_7\text{O}_4\text{H}_6\text{O}_3$ | 356.4                                            |       |
|                                                                                                        | O <sub>3</sub> H <sub>6</sub> |                 | 0.95                          | $\angle\text{H}_7\text{O}_4\text{H}_6$ | 96.6                                   | $\angle\text{H}_8\text{O}_3\text{H}_6\text{O}_4$ | 228                                              |       |
|                                                                                                        | O <sub>4</sub> H <sub>7</sub> |                 | 1.04                          | $\angle\text{H}_8\text{O}_3\text{H}_6$ | 107.8                                  | $\angle\text{H}_9\text{O}_4\text{H}_7\text{O}_3$ | 237.9                                            |       |
|                                                                                                        | O <sub>3</sub> H <sub>8</sub> |                 | 0.97                          | $\angle\text{H}_9\text{O}_4\text{H}_7$ | 93.7                                   |                                                  |                                                  |       |
|                                                                                                        | O <sub>4</sub> H <sub>9</sub> |                 | 1.66                          |                                        |                                        |                                                  |                                                  |       |



Table S1 (cont.)

|                                                                                                    | $E^{\text{Tot}}$              | $E^{\text{Ex}}$ | Distance                      |                                        | Angle                                  |                                                  | Dihedral                                         |       |
|----------------------------------------------------------------------------------------------------|-------------------------------|-----------------|-------------------------------|----------------------------------------|----------------------------------------|--------------------------------------------------|--------------------------------------------------|-------|
| <b>E3-[4]</b><br>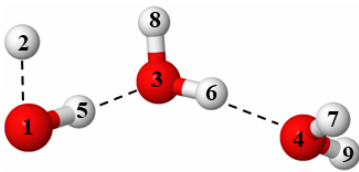 | -228.72288                    | 4.21            | O <sub>1</sub> H <sub>2</sub> | 1.38                                   | $\angle\text{O}_3\text{O}_1\text{H}_2$ | 88.3                                             | $\angle\text{O}_4\text{O}_3\text{O}_1\text{H}_2$ | 104.9 |
|                                                                                                    | (-228.567987)                 |                 | O <sub>1</sub> O <sub>3</sub> | 2.79                                   | $\angle\text{O}_4\text{O}_3\text{O}_1$ | 106.5                                            | $\angle\text{H}_5\text{O}_1\text{H}_2\text{O}_3$ | 357.2 |
|                                                                                                    | O <sub>3</sub> O <sub>4</sub> |                 | 2.73                          | $\angle\text{H}_5\text{O}_1\text{H}_2$ | 91.1                                   | $\angle\text{H}_6\text{O}_3\text{O}_4\text{O}_1$ | 123.9                                            |       |
|                                                                                                    | O <sub>1</sub> H <sub>5</sub> |                 | 1.07                          | $\angle\text{H}_6\text{O}_3\text{O}_4$ | 7.7                                    | $\angle\text{H}_7\text{O}_4\text{H}_6\text{O}_3$ | 237.0                                            |       |
|                                                                                                    | O <sub>3</sub> H <sub>6</sub> |                 | 0.99                          | $\angle\text{H}_7\text{O}_4\text{H}_6$ | 123.0                                  | $\angle\text{H}_8\text{O}_3\text{H}_6\text{O}_4$ | 164.6                                            |       |
|                                                                                                    | O <sub>4</sub> H <sub>7</sub> |                 | 0.97                          | $\angle\text{H}_8\text{O}_3\text{H}_6$ | 104.3                                  | $\angle\text{H}_9\text{O}_4\text{H}_7\text{O}_3$ | 151.3                                            |       |
|                                                                                                    | O <sub>3</sub> H <sub>8</sub> |                 | 1.00                          | $\angle\text{H}_9\text{O}_4\text{H}_7$ | 106.1                                  |                                                  |                                                  |       |
|                                                                                                    | O <sub>4</sub> H <sub>9</sub> |                 | 0.97                          |                                        |                                        |                                                  |                                                  |       |
